# Supplementary material for: NR3C1 hypermethylation in depressed and bullied adolescents
Source: PubMed Central journal article supplement (PMC6008402; doi:10.1038/s41398-018-0169-8), 2018-06-19
Supplement: 41398_2018_169_MOESM2_ESM.pdf [file 41398_2018_169_MOESM2_ESM.pdf]

Supplementary Figure.

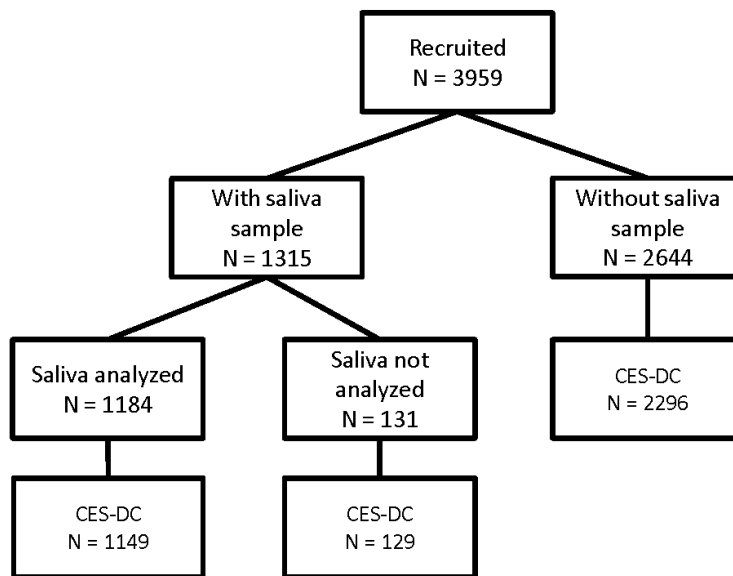

Flow chart of the participation. The Kupol Study, Stockholm 2013-2015.
